# Supplementary material for: Reliability of Compartmental Body Composition Measures in Weight-Stable Adults Using GE iDXA: Implications for Research and Practice
Source: PubMed Central journal article supplement (PMC6213248; doi:10.3390/nu10101484), 2018-10-12
Supplement: nutrients-10-01484-s001.pdf [file nutrients-10-01484-s001.pdf]

Supplementary data Table S1

Comparisons of body composition and variability for sex and BMI

| <b>Three month reliability study</b>   |                                     |                |                                      | <b>Two-way ANOVA with sex and BMI category (&lt; or &gt;=25) as the fixed variables</b> |                  |                  |                      |
|----------------------------------------|-------------------------------------|----------------|--------------------------------------|-----------------------------------------------------------------------------------------|------------------|------------------|----------------------|
| Mean (SD)                              | BMI < 25 kg/m <sup>2</sup> ; n = 39 |                | BMI >= 25 kg/m <sup>2</sup> ; n = 12 |                                                                                         | <b>p-values</b>  |                  |                      |
|                                        | Male; n = 3                         | Female; n = 36 | Male; n = 3                          | Female; n = 9                                                                           | Main effect: SEX | Main effect: BMI | Interaction: SEX-BMI |
| Age (years)                            | 38.9 (20.7)                         | 31.1 (12.4)    | 37.8 (16.8)                          | 48.6 (13.4)                                                                             | 0.804            | 0.175            | 0.124                |
| Height (cm)                            | 174.7 (6.0)                         | 164.4 (8.0)    | 171.6 (0.6)                          | 161.7 (6.6)                                                                             | 0.004            | 0.394            | 0.939                |
| Weight (kg)                            | 74.2 (4.7)                          | 56.9 (6.2)     | 78.6 (3.0)                           | 76.9 (14.9)                                                                             | 0.013            | 0.002            | 0.040                |
| BMI (kg/m <sup>2</sup> )               | 24.3 (0.7)                          | 21.1 (1.9)     | 26.7 (1.1)                           | 29.2 (4.0)                                                                              | 0.728            | <0.001           | 0.008                |
| A-FM (kg)                              | 1.5 (0.6)                           | 0.9 (0.4)      | 1.7 (0.8)                            | 2.8 (1.3)                                                                               | 0.330            | 0.001            | 0.004                |
| G-FM (kg)                              | 2.4 (0.1)                           | 3.2 (0.8)      | 2.9 (1.0)                            | 5.6 (1.5)                                                                               | <0.001           | 0.001            | 0.020                |
| TB-FM (kg)                             | 16.4 (2.6)                          | 15.9 (3.3)     | 18.0 (6.0)                           | 31.5 (10.4)                                                                             | 0.009            | 0.001            | 0.006                |
| A-LM (kg)                              | 3.9 (0.3)                           | 2.8 (0.4)      | 4.1 (0.6)                            | 3.1 (0.5)                                                                               | <0.001           | 0.150            | 0.654                |
| G-LM (kg)                              | 9.0 (0.5)                           | 6.1 (0.8)      | 9.3 (1.3)                            | 6.8 (1.0)                                                                               | <0.001           | 0.194            | 0.713                |
| TB-LM (kg)                             | 54.7 (4.6)                          | 38.3 (5.0)     | 57.0 (7.3)                           | 42.2 (5.8)                                                                              | <0.001           | 0.192            | 0.744                |
| A-TM (kg)                              | 5.5 (0.5)                           | 3.7 (0.4)      | 5.8 (0.3)                            | 6.0 (1.6)                                                                               | 0.031            | <0.001           | 0.008                |
| G-TM (kg)                              | 11.6 (0.5)                          | 9.5 (1.2)      | 12.5 (0.6)                           | 12.7 (2.2)                                                                              | 0.130            | 0.002            | 0.064                |
| TB-TM (kg)                             | 73.8 (4.7)                          | 56.5 (6.2)     | 78.0 (3.1)                           | 76.1 (14.6)                                                                             | 0.012            | 0.002            | 0.040                |
| A-%Fat                                 | 27 (8)                              | 24 (8)         | 28(12)                               | 45 (1)                                                                                  | 0.085            | 0.007            | 0.015                |
| G-%Fat                                 | 20 (2)                              | 33 (6)         | 23 (9)                               | 44 (7)                                                                                  | <0.001           | 0.021            | 0.140                |
| TB-%Fat                                | 22 (4)                              | 28 (5)         | 23 (8)                               | 40 (7)                                                                                  | <0.001           | 0.012            | 0.026                |
| VAT Mass (g)                           | 665.3 (612.0)                       | 84.3 (90.9)    | 659.6 (475.1)                        | 904.2 (784.9)                                                                           | 0.321            | 0.019            | 0.018                |
| VAT Vol (cm <sup>3</sup> )             | 705.2 (648.7)                       | 90.3 (95.6)    | 699.2 (503.6)                        | 958.5 (832.0)                                                                           | 0.322            | 0.019            | 0.018                |
| <b>Coefficient of variation (CV) %</b> |                                     |                |                                      |                                                                                         | Main effect: SEX | Main effect: BMI | Interaction: SEX-BMI |
| A-FM                                   | 5.32 (1.62)                         | 6.77 (3.97)    | 4.32 (2.08)                          | 3.27 (0.87)                                                                             | 0.900            | 0.157            | 0.429                |
| G-FM                                   | 3.38 (2.13)                         | 3.04 (2.00)    | 2.41 (1.51)                          | 2.03 (0.96)                                                                             | 0.663            | 0.238            | 0.981                |

|               |               |               |             |               |       |       |       |
|---------------|---------------|---------------|-------------|---------------|-------|-------|-------|
| TB-FM         | 2.91 (1.66)   | 2.82 (2.52)   | 1.32 (1.24) | 1.37 (0.66)   | 0.981 | 0.136 | 0.945 |
| A-LM          | 0.90 (0.22)   | 3.45 (2.22)   | 2.11 (0.07) | 2.78 (1.62)   | 0.083 | 0.767 | 0.307 |
| G-LM          | 0.80 (0.28)   | 1.71 (0.91)   | 0.96 (0.45) | 1.37 (0.94)   | 0.104 | 0.828 | 0.526 |
| TB-LM         | 0.43 (0.34)   | 1.39 (0.88)   | 0.64 (0.24) | 1.13 (0.58)   | 0.050 | 0.947 | 0.504 |
| A-TM          | 1.71 (0.59)   | 2.57 (1.62)   | 2.04 (0.46) | 1.51 (1.14)   | 0.807 | 0.588 | 0.302 |
| G-TM          | 0.96 (0.57)   | 1.36 (0.90)   | 1.06 (0.73) | 1.13 (0.52)   | 0.526 | 0.874 | 0.654 |
| TB-TM         | 0.86 (0.48)   | 0.91 (0.51)   | 0.59 (0.35) | 0.64 (0.32)   | 0.810 | 0.210 | 0.996 |
| A-%Fat        | 4.13 (1.24)   | 6.35 (3.91)   | 3.65 (2.10) | 3.10 (1.25)   | 0.595 | 0.234 | 0.376 |
| G-%Fat        | 2.46 (2.30)   | 2.33 (1.76)   | 2.17 (1.93) | 1.72 (1.18)   | 0.700 | 0.562 | 0.834 |
| TB-%Fat       | 3.33 (1.48)   | 2.76 (2.34)   | 1.18 (2.04) | 1.32 (0.86)   | 0.820 | 0.065 | 0.709 |
| VAT Mass (g)  | 15.81 (13.71) | 39.70 (30.17) | 8.37 (5.74) | 15.52 (15.24) | 0.202 | 0.194 | 0.489 |
| VAT Vol (cm3) | 15.82 (13.71) | 37.68 (27.47) | 8.37 (5.74) | 15.52 (15.24) | 0.194 | 0.185 | 0.507 |

**Precision study**

Two-way ANOVA with sex and BMI category (< or >=25) as the fixed variables

| Mean (SD)                | BMI < 25 kg/m <sup>2</sup> ; n = 39 |               | BMI >= 25 kg/m <sup>2</sup> ; n = 12 |               | p-values         |                  |                      |
|--------------------------|-------------------------------------|---------------|--------------------------------------|---------------|------------------|------------------|----------------------|
|                          | Male; n = 4                         | Female; n = 9 | Male; n = 10                         | Female; n = 7 | Main effect: SEX | Main effect: BMI | Interaction: SEX-BMI |
| Age (years)              | 36.0 (11.6)                         | 34.7 (8.6)    | 27.3 (9.9)                           | 28.3 (12.4)   | 0.966            | 0.072            | 0.776                |
| Height (cm)              | 177.0 (5.8)                         | 166.0 (1.9)   | 177.9 (6.6)                          | 172.3 (10.0)  | 0.003            | 0.170            | 0.309                |
| Weight (kg)              | 66.9 (12.8)                         | 60.4 (6.9)    | 110.1 (19.1)                         | 90.3 (26.1)   | 0.068            | <0.001           | 0.342                |
| BMI (kg/m <sup>2</sup> ) | 21.2 (2.7)                          | 21.9 (2.1)    | 34.6 (4.5)                           | 29.9 (5.2)    | 0.191            | <0.001           | 0.086                |
| A-FM (kg)                | 0.9 (0.3)                           | 0.7 (0.2)     | 4.2 (1.4)                            | 2.6 (1.0)     | 0.035            | <0.001           | 0.088                |
| G-FM (kg)                | 1.8 (0.04)                          | 3.1 (0.4)     | 6.0 (2.0)                            | 6.8 (3.3)     | 0.185            | <0.001           | 0.760                |
| TB-FM (kg)               | 12.3 (1.7)                          | 14.2 (1.8)    | 38.6 (11.9)                          | 34.6 (14.1)   | 0.784            | <0.001           | 0.448                |
| A-LM (kg)                | 3.6 (0.8)                           | 3.1 (0.6)     | 4.6 (0.6)                            | 3.6 (0.6)     | 0.004            | 0.006            | 0.287                |
| G-LM (kg)                | 8.0 (1.0)                           | 7.0 (1.2)     | 10.9 (1.5)                           | 8.2 (2.1)     | 0.006            | 0.002            | 0.166                |
| TB-LM (kg)               | 51.6 (10.4)                         | 43.5 (6.9)    | 65.7 (8.1)                           | 50.7 (11.3)   | 0.003            | 0.005            | 0.328                |

|                                        |               |               |                |               |                         |                         |                             |
|----------------------------------------|---------------|---------------|----------------|---------------|-------------------------|-------------------------|-----------------------------|
| A-TM (kg)                              | 4.6 (1.2)     | 3.9 (0.5)     | 8.9 (1.7)      | 6.3 (1.5)     | 0.004                   | <0.001                  | 0.076                       |
| G-TM (kg)                              | 10.1 (1.1)    | 10.4 (1.3)    | 17.3 (3.1)     | 15.4 (5.1)    | 0.515                   | <0.001                  | 0.384                       |
| TB-TM (kg)                             | 66.9 (12.7)   | 60.2 (6.4)    | 107.6 (16.8)   | 88.3 (23.8)   | 0.049                   | <0.001                  | 0.323                       |
| A-%Fat                                 | 18 (3)        | 18 (7)        | 46 (9)         | 41 (7)        | 0.389                   | <0.001                  | 0.410                       |
| G-%Fat                                 | 18 (2)        | 30 (5)        | 34 (6)         | 43 (7)        | <0.001                  | <0.001                  | 0.501                       |
| TB-%Fat                                | 19 (1)        | 24 (5)        | 35 (7)         | 38 (6)        | 0.064                   | <0.001                  | 0.619                       |
| VAT Mass (g)                           | 432.0 (354.6) | 87.2 (52.1)   | 1611.4 (773.2) | 649.3 (460.0) | 0.003                   | <0.001                  | 0.141                       |
| VAT Vol (cm3)                          | 457.9 (375.8) | 92.48 (55.2)  | 1708.1 (819.6) | 688.3 (487.6) | 0.003                   | <0.001                  | 0.141                       |
| <b>Coefficient of variation (CV) %</b> |               |               |                |               | <b>Main effect: SEX</b> | <b>Main effect: BMI</b> | <b>Interaction: SEX-BMI</b> |
| A-FM                                   | 1.72 (1.48)   | 2.77 (1.69)   | 1.37 (0.88)    | 1.50 (1.00)   | 0.244                   | 0.116                   | 0.362                       |
| G-FM                                   | 1.50 (1.63)   | 1.20 (0.97)   | 1.17 (1.30)    | 1.44 (1.22)   | 0.973                   | 0.919                   | 0.551                       |
| TB-FM                                  | 1.21 (0.55)   | 0.79 (0.62)   | 0.61 (0.44)    | 0.62 (0.50)   | 0.324                   | 0.068                   | 0.307                       |
| A-LM                                   | 0.68 (0.84)   | 0.64 (0.41)   | 1.66 (0.82)    | 1.21 (1.09)   | 0.439                   | 0.019                   | 0.517                       |
| G-LM                                   | 0.33 (0.38)   | 0.89 (0.77)   | 0.45 (0.46)    | 0.57 (0.35)   | 0.126                   | 0.634                   | 0.302                       |
| TB-LM                                  | 0.47 (0.12)   | 0.36 (0.20)   | 0.50 (0.55)    | 0.61 (0.41)   | 0.994                   | 0.378                   | 0.487                       |
| A-TM                                   | 0.53 (0.35)   | 0.61 (0.55)   | 0.80 (0.74)    | 0.47 (0.46)   | 0.589                   | 0.783                   | 0.383                       |
| G-TM                                   | 0.49 (0.29)   | 0.46 (0.55)   | 0.65 (0.67)    | 0.70 (0.42)   | 0.971                   | 0.345                   | 0.855                       |
| TB-TM                                  | 0.13 (0.03)   | 0.09 (0.08)   | 0.25 (0.29)    | 0.30 (0.21)   | 0.966                   | 0.049                   | 0.597                       |
| A-%Fat                                 | 1.80 (1.84)   | 2.54 (1.13)   | 1.16 (0.90)    | 1.57 (1.14)   | 0.217                   | 0.086                   | 0.723                       |
| G-%Fat                                 | 1.35 (1.17)   | 1.24 (0.99)   | 0.65 (0.71)    | 1.06 (0.54)   | 0.639                   | 0.186                   | 0.439                       |
| TB-%Fat                                | 1.34 (0.52)   | 0.86 (0.59)   | 0.69 (0.47)    | 0.57 (0.67)   | 0.186                   | 0.044                   | 0.423                       |
| VAT Mass (g)                           | 19.81 (19.03) | 18.27 (23.92) | 3.52 (3.34)    | 11.82 (18.71) | 0.361                   | 0.109                   | 0.863                       |
| VAT Vol (cm3)                          | 19.81 (19.03) | 18.27 (23.92) | 3.52 (3.34)    | 11.82 (18.71) | 0.361                   | 0.109                   | 0.863                       |

Table S2 Participant characteristics and body composition: Participants with VAT detected as 0 g.

|                                                       | Participants with VAT<br>= 0 g on at Least One<br>Occasion |           | Participants With<br>VAT > 0 g for All<br>Three Measures |            | <i>p</i> -Value   |
|-------------------------------------------------------|------------------------------------------------------------|-----------|----------------------------------------------------------|------------|-------------------|
| Number of participants (Male n, (%))                  | 7 (0 (0))                                                  |           | 41 (6 (15))                                              |            |                   |
| Age (years) Median (5th–95th percentile)              | 24.5 (18.7–46.3)                                           |           | 32.0 (19.2–58.3)                                         |            | 0.336             |
| Height (cm) Median (5th–95th percentile)              | 165.2 (154.4–178.7)                                        |           | 164.7 (148.7–177.9)                                      |            | 0.310             |
| Weight (kg) Median (5th–95th percentile)              | 55.2 (47.3–69.3)                                           |           | 60.4 (51.5–83.8)                                         |            | 0.285             |
| BMI (kg/m <sup>2</sup> ) Median (5th–95th percentile) | 19.8 (19.1–23.0)                                           |           | 22.7 (18.4–31.6)                                         |            | <b>0.036</b>      |
| Measure                                               | Mean (SD)                                                  | Range     | Mean (SD)                                                | Range      |                   |
| A-FM (kg)                                             | 0.8 (0.2)                                                  | 0.5–1.2   | 14.1 (1.0)                                               | 0.3–4.9    | <b>0.037</b>      |
| G-FM (kg)                                             | 3.3 (0.6)                                                  | 2.2–4.1   | 3.6 (1.5)                                                | 1.2–7.8    | 0.883             |
| TB-FM (kg)                                            | 15.7 (3.2)                                                 | 11.1–20.4 | 19.3 (8.3)                                               | 7.8–47.6   | 0.299             |
| A-LM (kg)                                             | 28.9 (0.5)                                                 | 2.2–3.5   | 3.0 (0.6)                                                | 2.1–4.7    | 0.758             |
| G-LM (kg)                                             | 62.4 (0.7)                                                 | 5.1–6.9   | 6.7 (1.4)                                                | 4.6–10.1   | 0.698             |
| TB-LM (kg)                                            | 39.1 (5.3)                                                 | 30.4–46.4 | 41.4 (7.9)                                               | 30.1–61.4  | 0.620             |
| A-TM (kg)                                             | 3.7 (0.5)                                                  | 3.2–4.3   | 4.5 (1.3)                                                | 2.6–8.4    | 0.146             |
| G-TM (kg)                                             | 9.8 (1.1)                                                  | 8.3–11.2  | 10.5 (2.0)                                               | 6.7–15.6   | 0.528             |
| TB-TM (kg)                                            | 57.3 (8.1)                                                 | 46.9–69.0 | 63.1 (12.4)                                              | 43.2–98.6  | 0.262             |
| A-%Fat                                                | 21 (6)                                                     | 15–28     | 29 (12)                                                  | 9–59       | <b>0.048</b>      |
| G-%Fat                                                | 34 (4)                                                     | 26–37     | 34 (9)                                                   | 15–52      | 0.920             |
| TB-%Fat                                               | 27 (3)                                                     | 22–31     | 30 (8)                                                   | 16–50      | 0.524             |
| VAT Mass (g)                                          | 6.3 (7.1)                                                  | 0–19.9    | 341.31 (517.69)                                          | 5.0–2478.3 | <b>&lt; 0.001</b> |
| VAT Vol (cm <sup>3</sup> )                            | 6.7 (7.6)                                                  | 0–21.1    | 361.79 (548.75)                                          | 5.3–2627.0 | <b>&lt; 0.001</b> |

A = Android; FM = Fat mass; FFM = Fat free mass; G = Gynoid; LM = Lean mass; TB = Total body; TM = Total mass; VAT = Visceral adipose tissue; Differences between groups measured by Mann–Whitney U test for independent samples
